# Supplementary material for: Fermented ginseng attenuates lipopolysaccharide-induced inflammatory responses by activating the TLR4/MAPK signaling pathway and remediating gut barrier
Source: Royal Society of Chemistry journal article supplement (doi:10.1039/d0fo02404j), 2020-12-10
Supplement: d0fo02404j1.pdf [file d0fo02404j1.pdf]

## Supplementary

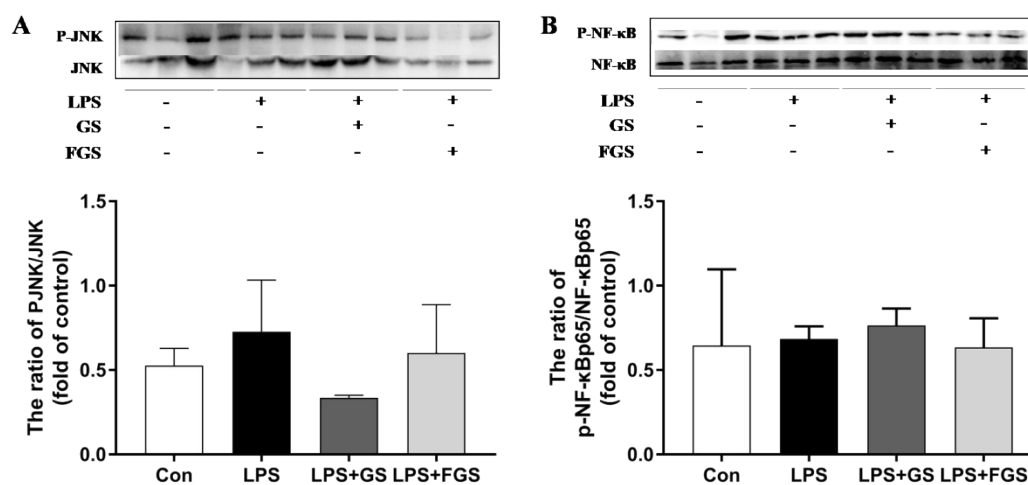

Supplementary: Effects of fermented ginseng on the expression of inflammatory proteins JNK (A) and NF-κB (B) in the liver of LPS-induced inflammatory mice. Con: control group; LPS: LPS stimulation group; LPS+GS: Ginseng intervention group; LPS+FGS: Fermented ginseng intervention group.
